# Supplementary material for: A Targeted Nanoprobe Based on Carbon Nanotubes-Natural Biopolymer Chitosan Composites
Source: PubMed Central journal article supplement (PMC5245750; doi:10.3390/nano6110216), 2016-11-17
Supplement: nanomaterials-06-00216-s001.pdf [file nanomaterials-06-00216-s001.pdf]

# Supplementary Materials: A Targeted Theranostic Nanoprobe Based on Carbon Nanotubes-Natural Biopolymer Chitosan Composites

Baoyan Wu and Na Zhao

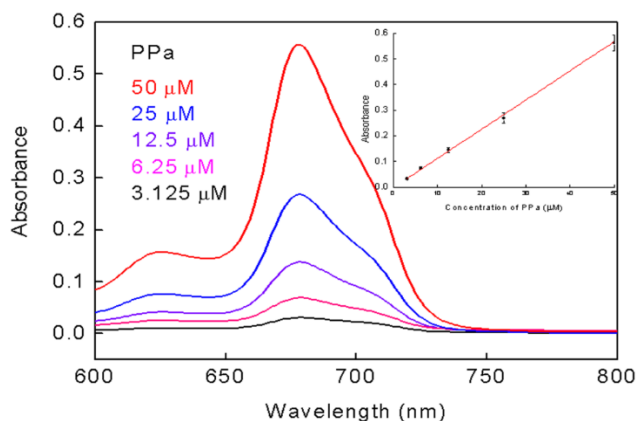

**Figure S1.** The absorption spectra of PPa with different concentrations. Inset: The standard curve for PPa absorbance value at 673 nm. Data represent mean values  $\pm$  standard deviation,  $n = 3$ .

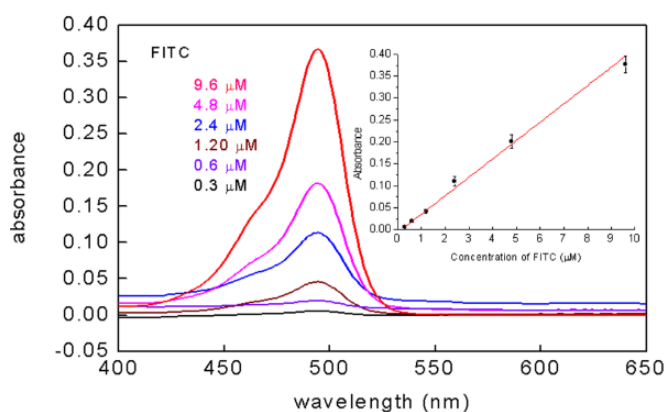

**Figure S2.** The absorption spectra of FITC with different concentrations. Inset: The standard curve for FITC absorbance value at 495 nm. Data represent mean values  $\pm$  standard deviation,  $n = 3$ .

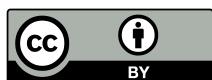

© 2016 by the authors. Submitted for possible open access publication under the terms and conditions of the Creative Commons Attribution (CC-BY) license (<http://creativecommons.org/licenses/by/4.0/>).
